# Supplementary material for: Increased neuronal signatures of targeted memory reactivation during slow-wave up states
Source: PubMed Central journal article supplement (PMC6389952; doi:10.1038/s41598-019-39178-2), 2019-02-25
Supplement: 41598_2019_39178_MOESM1_ESM.pdf [file 41598_2019_39178_MOESM1_ESM.pdf]

## Supplementary Information

for

### Increased neuronal signatures of targeted memory reactivation during slow-wave up states

Maurice Göldi<sup>1,2</sup>, Eva van Poppel<sup>1</sup>, Björn Rasch<sup>1\*</sup>, Thomas Schreiner<sup>3\*</sup>

<sup>1</sup> University of Fribourg, Department of Psychology, Fribourg, Switzerland

<sup>2</sup> Neuroscience Center Zurich (ZNZ), Zurich, Switzerland

<sup>3</sup> Centre for Human Brain Health, School of Psychology, University of Birmingham, Birmingham, UK

Maurice Göldi, University of Fribourg, Department of Psychology, Division of Cognitive Biopsychology and Methods, Rue P.-A.-Faucigny 2, CH-1701 Fribourg, Switzerland

Eva van Poppel, , University of Fribourg, Department of Psychology, Division of Cognitive Biopsychology and Methods, Rue P.-A.-Faucigny 2, CH-1701 Fribourg, Switzerland

\*Corresponding authors:

University of Birmingham, School of Psychology, Edgbaston, B152TT Birmingham, United Kingdom

Email: T.Schreiner@bham.ac.uk

Phone: +44 121 414 8690

Björn Rasch, University of Fribourg, Department of Psychology, Division of Cognitive Biopsychology and Methods, Rue P.-A.-Faucigny 2, CH-1701 Fribourg, Switzerland;

Email: Bjoern.Rasch@unifr.ch

Phone: +41 26 300 7637

**Supplementary Table 1:** Overview of memory performance

|           | Up-state      | Down-state    | Uncued        |
|-----------|---------------|---------------|---------------|
| Learning  | 19.87 ± 0.90  | 20.00 ± 0.95  | 20.56 ± 0.94  |
| Retrieval | 19.75 ± 1.05  | 19.37 ± 1.21  | 18.87 ± 1.30  |
| Change    | - 0.12 ± 0.52 | - 0.62 ± 0.80 | - 1.68 ± 0.61 |
| % Change  | 99.30 ± 2.89  | 90.92 ± 3.14  | 96.83 ± 4.27  |

Data are means ± SEM; Numbers indicate absolute or relative values of correctly recalled words that were either presented during SOs up- and down-states or remained uncued. For cued recall testing, the number of correctly recalled words during the learning phase before and the retrieval phase after the retention interval are indicated. Change (% Change) refers to the absolute (relative) difference in performance between the learning and retrieval phases.

Supplementary Table 2: Word list used in the memory task

| Dutch | German  | English      |        |             |                |
|-------|---------|--------------|--------|-------------|----------------|
| aap   | Affe    | monkey       | oog    | Auge        | eye            |
| baan  | Beruf   | job          | pad    | Pfad        | path           |
| beek  | Bach    | brook        | piek   | Gipfel      | peak           |
| been  | Bein    | leg          | pijn   | Schmerzen   | pain           |
| bel   | Klingel | bell         | pijp   | Pfeife      | pipe           |
| beurs | Börse   | stock market | pols   | Puls        | pulse          |
| bij   | Biene   | bee          | pont   | Fähre       | ferry          |
| blik  | Blech   | sheet metal  | prik   | Spritze     | syringe        |
| bloem | Blume   | flower       | rek    | Regal       | rack           |
| bloes | Bluse   | blouse       | rib    | Rippe       | rib            |
| boek  | Buch    | book         | rijst  | Reis        | rice           |
| boer  | Bauer   | farmer       | rit    | Fahrt       | drive          |
| bol   | Kugel   | sphere       | roer   | Ruder       | rudder         |
| boom  | Baum    | tree         | rug    | Rücken      | back           |
| bos   | Wald    | forest       | rups   | Raupe       | caterpillar    |
| bout  | Bolzen  | bolt         | sap    | Saft        | juice          |
| brug  | Brücke  | bridge       | schok  | Schlag      | blow           |
| buik  | Bauch   | belly        | schol  | Scholle     | plaice         |
| buks  | Büchse  | rifle        | sla    | Salat       | salad          |
| dak   | Dach    | roof         | slot   | Schloss     | lock           |
| deel  | Teil    | part         | sluis  | Schleuse    | sluice         |
| deur  | Tür     | door         | snor   | Schnurrbart | moustache      |
| dief  | Dieb    | thief        | soep   | Suppe       | soup           |
| dijk  | Teich   | pond         | spaak  | Speiche     | spoke          |
| doek  | Tuch    | cloth        | steen  | Stein       | stone          |
| dorp  | Dorf    | village      | ster   | Stern       | star           |
| duim  | Daumen  | thumb        | stof   | Staub       | dust           |
| eed   | Eid     | oath         | stoot  | Stoss       | push           |
| fles  | Flasche | bottle       | strijd | Kampf       | battle         |
| fout  | Fehler  | fault        | stuur  | Lenkrad     | steering wheel |
| geur  | Geruch  | odor         | taart  | Kuchen      | pie            |
| gif   | Gift    | poison       | tand   | Zahn        | tooth          |
| hak   | Absatz  | heel         | tas    | Tasche      | bag            |
| hei   | Heide   | heath        | teek   | Zecke       | tick           |
| hiel  | Ferse   | heel         | tent   | Zelt        | tent           |
| hout  | Holz    | wood         | tijd   | Zeit        | time           |
| hulp  | Hilfe   | help         | tong   | Zunge       | tongue         |
| hut   | Hütte   | hut          | trap   | Treppe      | stairs         |
| inkt  | Tinte   | ink          | veer   | Feder       | feather        |
| jas   | Jacke   | jacket       | vis    | Fisch       | fish           |
| kast  | Schrank | closet       | vlees  | Fleisch     | meat           |
| kerk  | Kirche  | church       | voet   | Fuss        | foot           |
| kok   | Koch    | cook         | vork   | Gabel       | fork           |
| kras  | Kratzer | scratch      | vuil   | Schmutz     | dirt           |
| kruk  | Krücke  | crutch       | vuur   | Feuer       | fire           |
| kus   | Kuss    | kiss         | waard  | Wirt        | innkeeper      |
| kust  | Küste   | coast        | walm   | Qualm       | smoke          |
| kwal  | Qualle  | jellyfish    | will   | Wille       | will           |
| lens  | Linse   | lens         | winst  | Gewinn      | profit         |
| lijf  | Leib    | body         | wol    | Wolle       | wool           |
| lijm  | Kleber  | glue         | wond   | Wunde       | wound          |
| lip   | Lippe   | lip          | worst  | Wurst       | sausage        |
| loof  | Laub    | foliage      | zalm   | Lachs       | salmon         |
| melk  | Milch   | milk         | zeep   | Seife       | soap           |
| mes   | Messer  | knife        | zit    | Sitz        | seat           |
| mond  | Mund    | mouth        | zon    | Sonne       | sun            |
| mug   | Mücke   | mosquito     | zool   | Sohle       | sole           |
| muts  | Mütze   | cap          | zout   | Salz        | salt           |
| muur  | Mauer   | wall         |        |             |                |
| neef  | Neffe   | nephew       |        |             |                |
| neus  | Nase    | nose         |        |             |                |
| nier  | Niere   | kidney       |        |             |                |

**Wordlist used for memory task.** Dutch-German word pairs used during the memory task.

**Supplementary Figure 1: Slow Wave Detection Algorithm State Diagram**

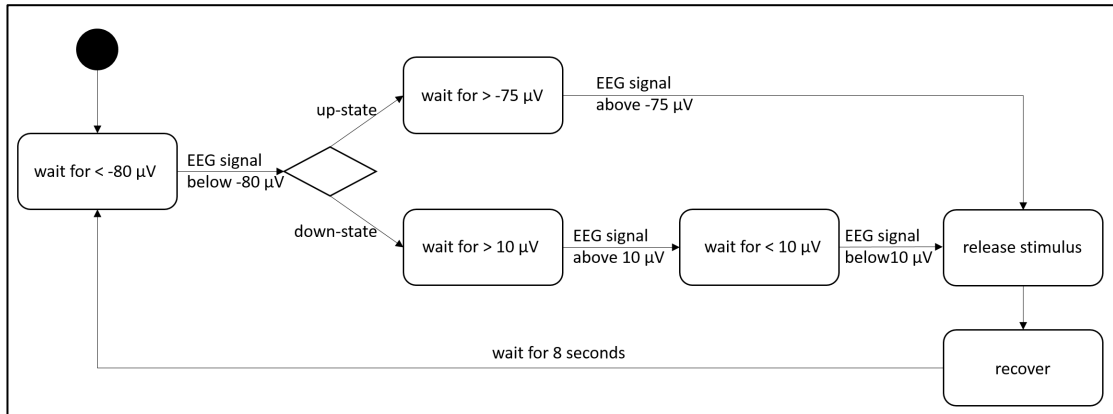

**Online Detection Finite-State Machine Diagram** Implementation of the slow-wave detection algorithm as a finite state machine. The algorithm starts at the black dot and traverses through the states while it is running.

**Supplementary Figure 2: ERPs for Remembered and Non-Remembered cues**

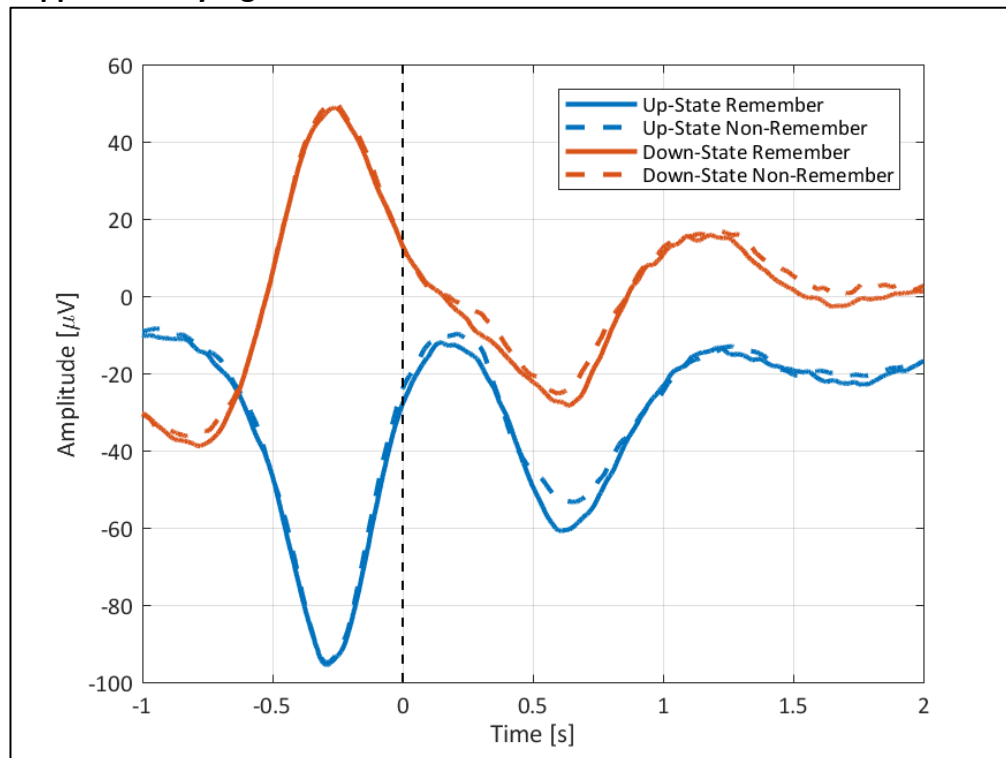

**Comparison of ERPs for remembered and non-remembered words.** ERPs for up- (blue) and down-state (red) remembered (solid line) and non-remembered (dashed line) words are shown. There is no significant difference between remembered and non-remembered word cues.

**Supplementary Figure 3: Phase Distribution across the Scalp**

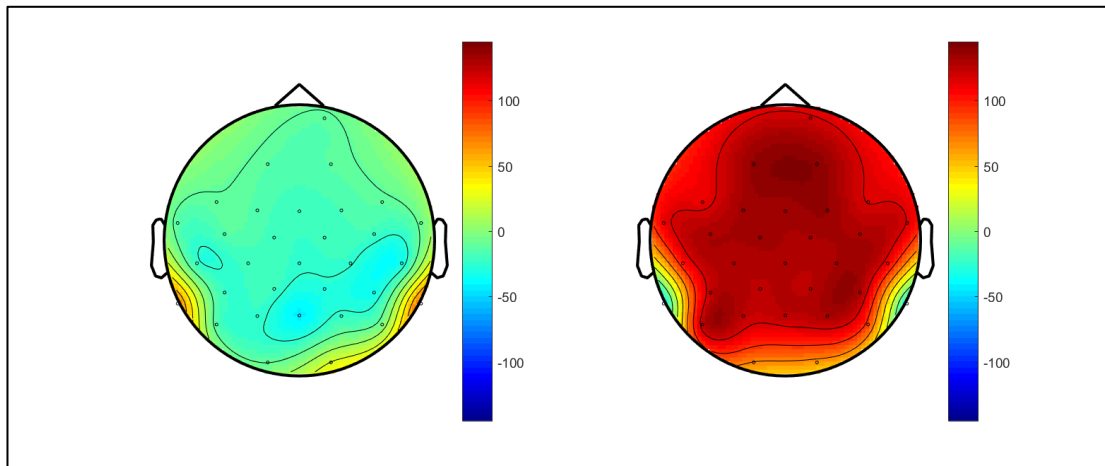

**Topographical distribution of phase.** Signal phase at stimulus release for up-state cues (left) and down-state cues (right). While the algorithm detects slow-waves at the Fz electrode only, the phase distribution across the scalp is uniform at the time of cue onset. Up-state phase is around  $-20^\circ$  and down-state phase around  $120^\circ$ .

**Supplementary Figure 4: Phase Accuracy for each Subject**

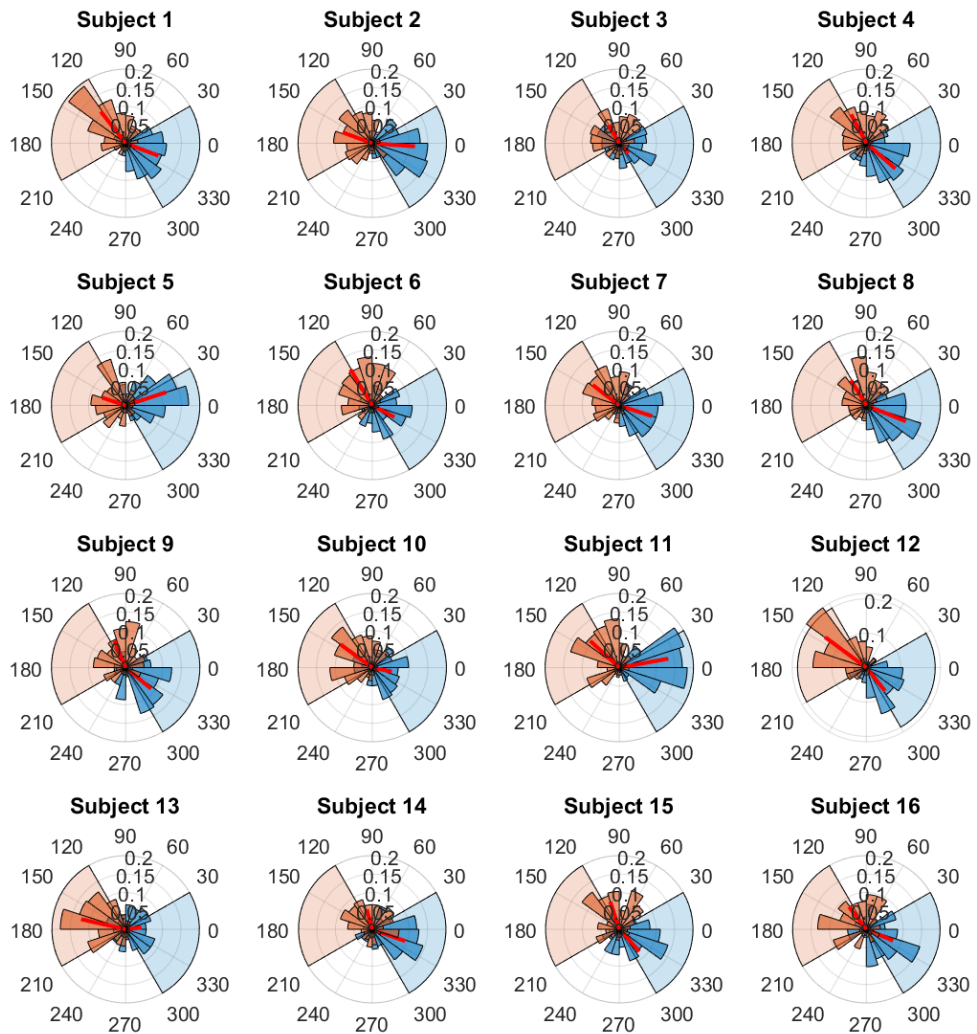

**Phase accuracy for each subject at trial level.** Up-state cues are shown in blue. Down-state cues are shown in red. Trial level phase accuracy for each individual subject shows a clear distinction between up- and down-state cues for all subjects.

**Supplementary Figure 5: Oscillatory analysis of up- versus down-state cues.**

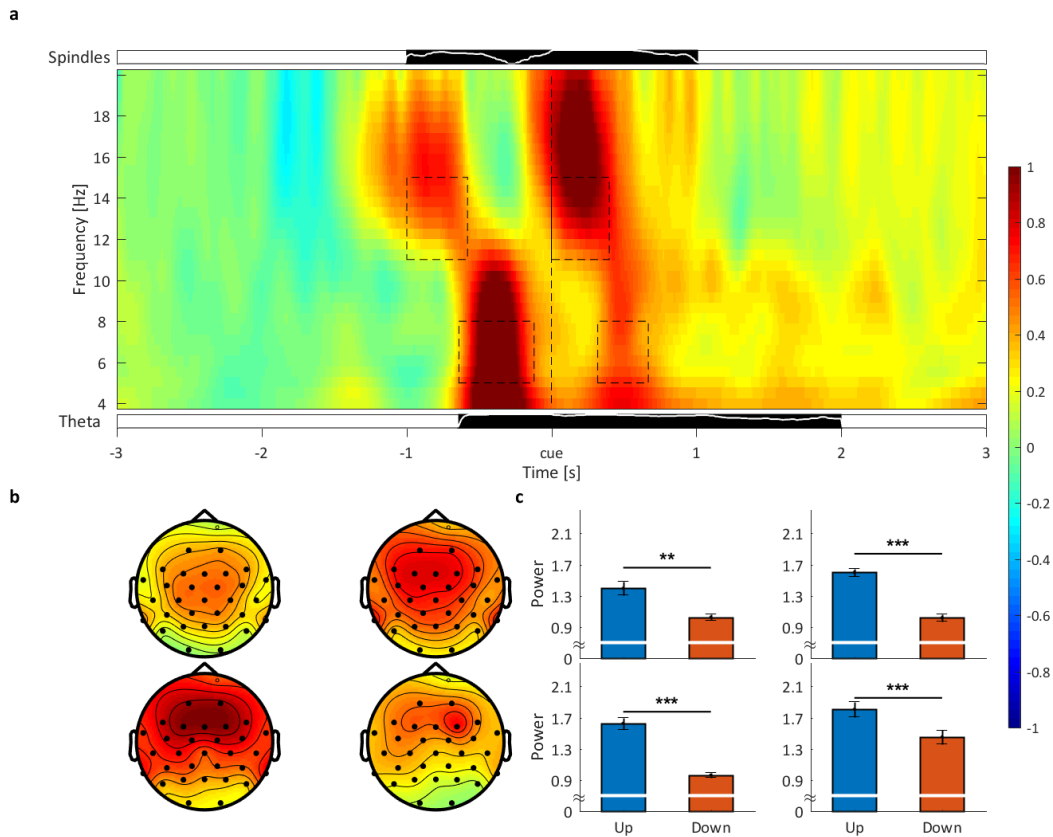

**Oscillatory analysis of up- versus down-state cues.** Panel a) illustrates the power contrast between words presented during SOs up- and down-states. Black bars (significant cluster in frequency band analysis) with white lines below and above the time-frequency plot indicate the number of significantly differing electrodes for the theta and spindle band respectively. The full height of the bar corresponds to 100% (31) electrodes. Panel b) topographical distribution of the areas marked with a dashed box in a) for the spindle (top row) and theta (bottom row) band, pre-stimulus (left column) and post-stimulus (right column). Significant electrodes are shown as filled black dots. Panel c) shows the same data averaged across time, frequency and significant channels within the respective cluster. The power is scaled between -1 and 1 for both panels a) and b). Time-frequency data is shown for the Fz electrode.



### Supplementary Figure 6: Up-State Remembered versus Non-Remembered Words Time-Frequency Analysis

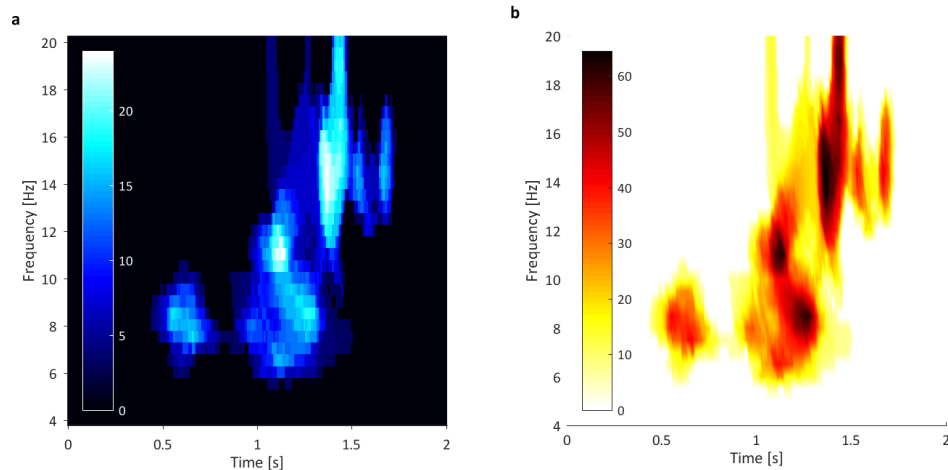

**Positive cluster up-state remembered vs non-remembered.** a) Number of electrodes involved in positive cluster found in time-frequency analysis of up-state remembered versus non-remembered words across frequency and time. b) Summed t-values for positive cluster found in time-frequency analysis of up-state remembered versus non-remembered words across frequency and time. The time-frequency analysis of up-state cues of remembered versus non-remembered words between 0 and 2 seconds after stimulus onset, across all channels and from 4 to 20 Hz revealed one significant positive cluster lasting from 0.44 to 1.73 seconds and involving all electrodes ( $P = 0.013$ ).

### Sleep stage specific EEG results

For memory cues played during the up-state in sleep stage N2 ( $n = 72.31 \pm 11.72$ ) we observed a significant increase in theta power for later remembered compared to later non-remembered words between 500 and 1730 ms involving a cluster of 29 channels ( $P = 0.022$ , see Supplementary Figure 7a and Figure 7b left column, bottom row). Also in the spindle band, the overall analysis revealed a significant increase in spindle power for remembered compared to non-remembered words between 920 and 1730 ms involving 30 electrodes ( $P = 0.021$ , see Supplementary Figure 7b left column, top row). In contrast to cues presented during SO up-states, we did not observe any significant power differences for remembered vs. non-remembered words played in the SO down-state, neither for the theta (no cluster found) nor the spindle band (no cluster found, see Supplementary Figure 7c and d). Even a more

restricted test-statistics limited to the time-range of the up-state clusters revealed no significant effect. In a next step we directly compared the oscillatory fingerprint of up- and down-state reactivation, by contrasting the 'subsequent reactivation effect' (i.e. remembered vs. non-remembered words) between those conditions (Supplementary Figure 7e and f). Here, an increase in spindle activity for up- as compared to down state cueing was observable, ranging from 920 to 2000 ms and involving all 31 electrodes ( $P = 0.005$ , see Supplementary Figures 7e and f top row). No significant difference emerged with regards to theta activity ( $P > 0.10$ , Supplementary Figures 7e and f bottom row).

During SWS, memory cues targeted into SO up-states showed only a trend for an increase in theta ( $P = 0.093$ , from 930 to 1480 ms) and no significant increase for spindles ( $P > 0.20$ , see Supplementary Figure 8a and b; overall number of cues:  $231.38 \pm 20.98$ ). For cues presented during SO down-states there were no significant power differences for theta or spindles (both exhibited no significant clusters, see Supplementary Figure 8c and d). Contrasting the 'subsequent reactivation effect' also showed no significant difference (theta:  $P > 0.30$ , spindles:  $P > 0.60$ , see Supplementary Figure 8e and f).

When directly comparing memory cues played during the up-states of sleep stage N2 and SWS we observed a significant increase in theta power for later remembered words in N2 as compared to SWS across the whole range (0 - 2000 ms) involving all channels ( $P < 0.001$ , see Supplementary Figure 9a and 9b left column, bottom row). Also in the spindle band, the overall analysis revealed a significantly higher spindle power for words remembered during N2 compared to SWS between 300 and 2000

ms involving all electrodes ( $P = 0.003$ , see Supplementary Figure 9b left column, top row).

### Supplementary Figure 7: N2 Oscillatory Results

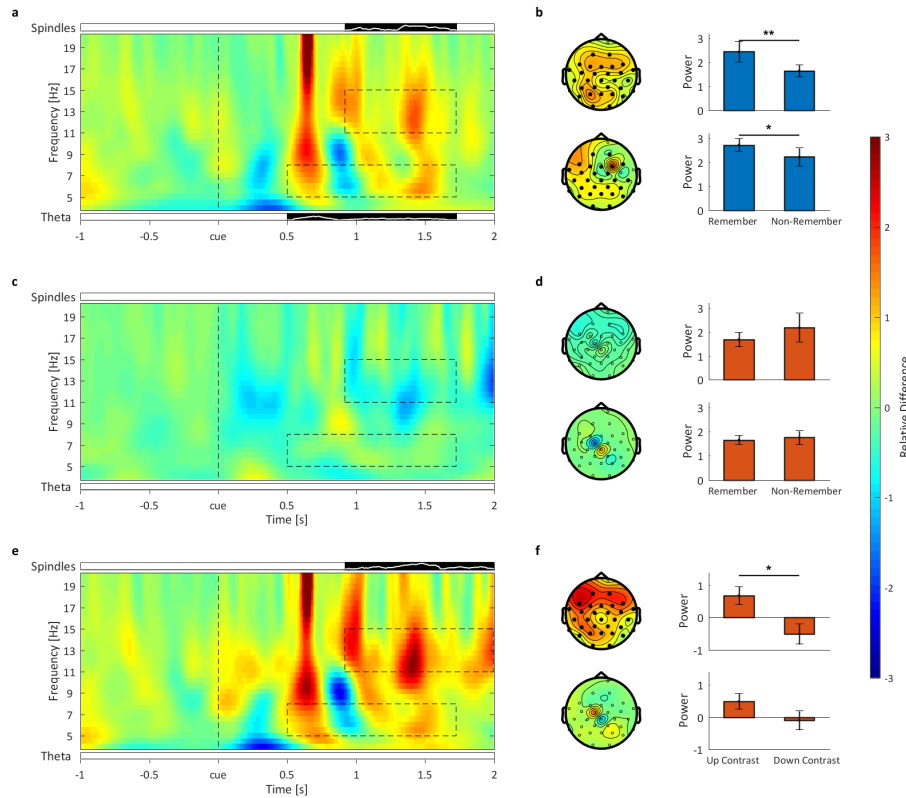

**N2 Oscillatory Results.** Time-frequency contrasts between remembered and not-remembered words in the theta and sleep spindle band for a) up-state and c) down-state cues, averaged over all 31 significant spindle electrodes. Black bars (significant cluster in frequency band analysis) with white lines below and above the time-frequency plot show the number of significantly differing electrodes for the theta and sleep spindle band respectively. The full height of the bar corresponds to 100% (31) electrodes. Dashed boxes indicate the areas of significant difference between remembered and not remembered words. These time-windows were used to illustrate the topographical distributions (b, d and f) left column, top row spindle band, bottom row theta band; significant electrodes shown as filled black dots). b), d) and f) right column show the mean power within the significant clusters, averaged over the significant electrodes, all frequencies and time in the sleep spindle (top) and theta (bottom) band. For up-state cueing a) remembered words show enhanced power in the theta (5-8 Hz) as well as the sleep spindle (11-15 Hz) range compared to not-remembered words. Averaged over time, channels and frequency band, within these clusters this difference was significant in the theta band ( $t_{15} = 2.00$ ,  $P = 0.032$ ; see b right column, bottom row) and in the spindle band ( $t_{15} = 2.73$ ,  $P = 0.008$ ; see b, right column, top row). For words presented during down-states c) no significant difference emerged between remembered and forgotten words, neither in the sleep spindle nor the theta band. Consequently, averaged activity in those clusters observed in the analysis of SO up-states did not reveal any significant differences for down-state cues, neither in the theta ( $t_{15} = -0.35$ ,  $P = 0.635$ ) nor the spindle band ( $t_{15} = -1.50$ ,  $P = 0.923$ ). The difference between the two

contrasts of up and down e) showed enhanced power in the spindle band, but not in the theta band. Averaged activity in the spindle cluster ( $t_{15} = 2.34$ ,  $P = 0.017$ ; see f right column, top row) showed a significant difference, while theta activity (averaged over the duration of the SO up-state theta cluster) showed no statistical difference ( $t_{15} = 1.44$ ,  $P = 0.109$ ; see f right column, bottom row). Mean  $\pm$  s.e.m. are indicated. \*\*:  $P < 0.01$ ; \*:  $P < 0.05$ .

**Supplementary Figure 8: SWS Oscillatory Results**

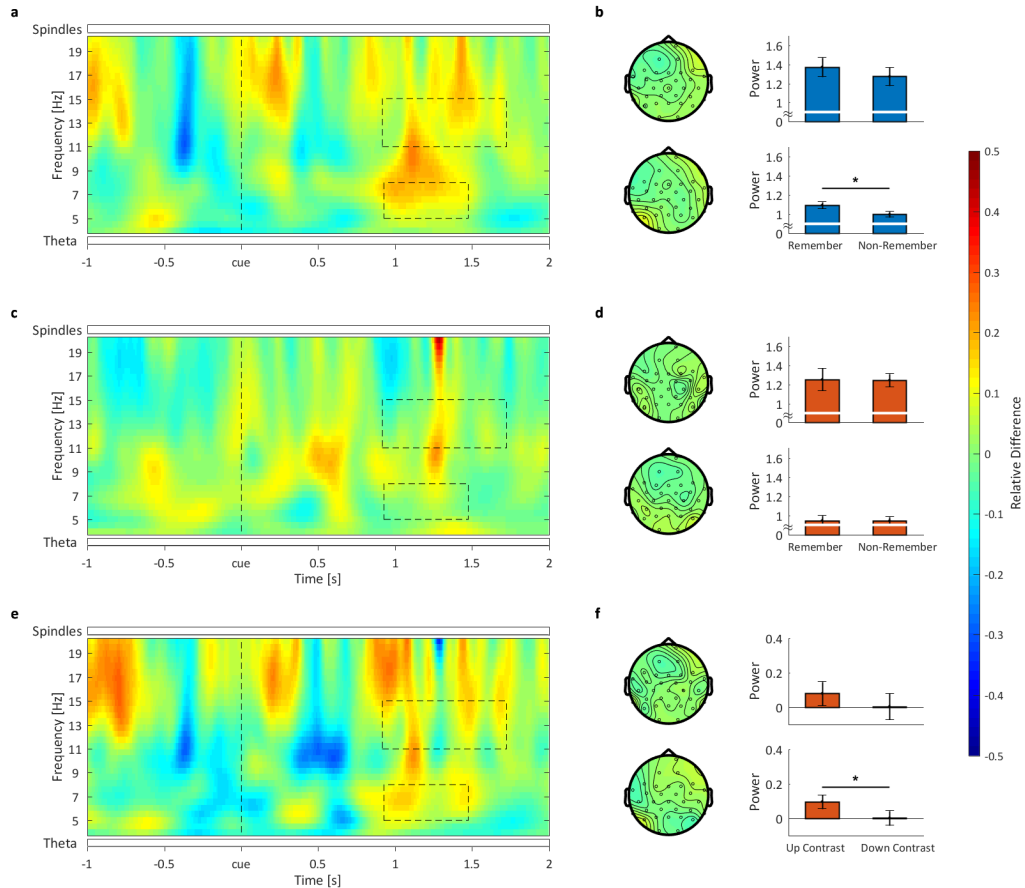

**SWS Oscillatory Results.** Time-frequency contrasts between remembered and not-remembered words in the theta and sleep spindle band for a) up-state and c) down-state cues, averaged over all 18 electrodes that show a trend in the theta band. As there were no significant clusters in SWS for spindle, we used the significant time windows and electrodes of the N2 clusters for b), d) and f) right column, showing the mean power, averaged over the electrodes, all frequencies and time in the sleep spindle (top) band. For the same analysis in the theta (bottom) band, we used the time window that showed a trend of a difference for up-state cueing. For up-state cueing a) remembered words show no enhanced power in the theta (5-8 Hz) nor the sleep spindle (11-15 Hz) range compared to not-remembered words. Averaged over time, channels and frequency band, within these clusters this difference was significant in the theta band ( $t_{15} = 2.43$ ,  $P = 0.014$ ; see b right column, bottom row) but not in the spindle band ( $t_{15} = 1.28$ ,  $P = 0.109$ ; see b, right column, top row). For words presented during down-states c) no significant difference emerged between remembered and forgotten words, neither in the sleep spindle nor the theta band. Consequently, averaged activity in those clusters observed in the analysis of SO up-states did not reveal any significant differences for down-state cues, neither in the theta ( $t_{15} = 0.05$ ,  $P = 0.480$ ) nor

the spindle band ( $t_{15} = 0.07$ ,  $P = 0.472$ ). The difference between the two contrasts of up and down e) again showed no enhanced power in the spindle band, nor in the theta band. Averaged activity in the spindle cluster ( $t_{15} = 0.33$ ,  $P = 0.374$ ; see f right column, top row) showed no significant difference, but averaged theta activity showed statistical difference ( $t_{15} = 1.84$ ,  $P = 0.043$ ; see f right column, bottom row).

### Supplementary Figure 9: Oscillatory Results N2 VS SWS

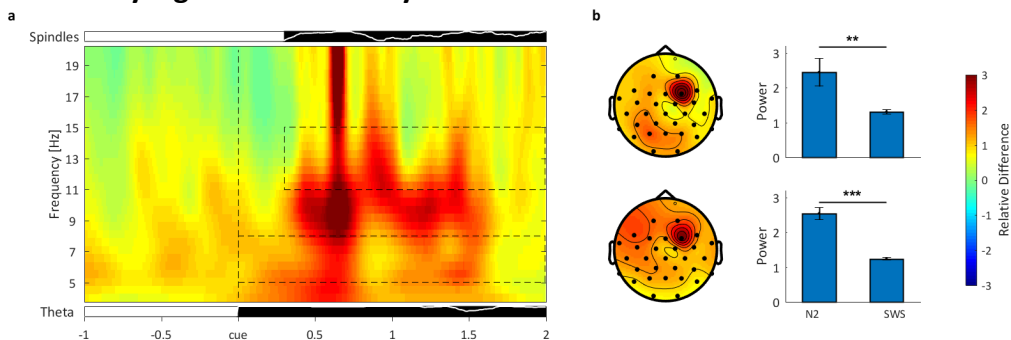

**N2 vs. SWS Oscillatory Result.** a) Time-frequency contrasts between up-state cued remembered words in N2 and SWS in the theta and sleep spindle band averaged over all electrodes. Dashed boxes show the duration of the significant clusters for theta (0 – 2000 ms) and spindles (300 – 2000 ms). These time windows were used to show the topographical distribution (b) left column) of theta (bottom) and spindles (top). b) right column shows the averaged relative difference between N2 and SWS averaged over time frequency and channels. We find a significant difference between N2 and SWS for both theta ( $t_{15} = 7.04$ ,  $P < 0.001$ ; b) bottom right) and spindles ( $t_{15} = 2.76$ ,  $P = 0.007$ ; b) top right). Mean  $\pm$  s.e.m. are indicated. \*\*:  $P < 0.01$ ; \*\*\*:  $P < 0.001$ .

### Supplementary Figure 10: ERP for 0.5 – 1 Hz Bandpass filtered Signal

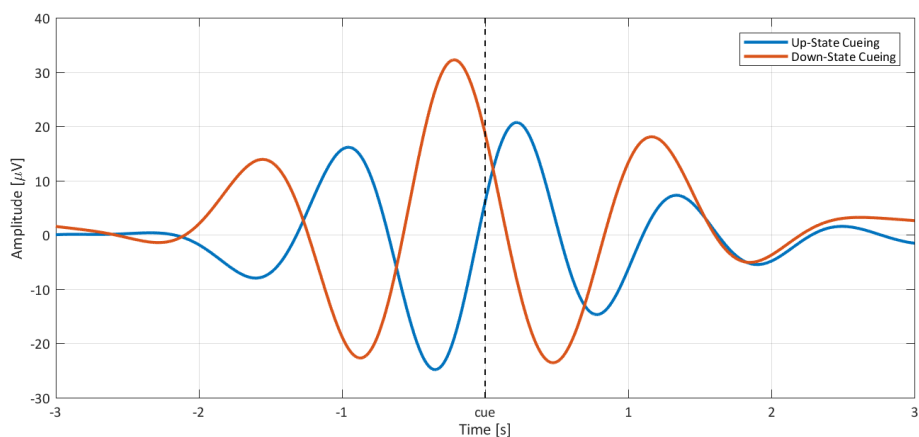

**0.5 – 1 Hz bandpass filtered ERP.** To validate whether the targeting algorithm (lowpass filtered at 1.5 Hz) captures the correct states of slow wave (0.5 – 1.0 Hz) the data was bandpass filtered between 0.5 – 1 Hz. Comparable to the main results (Figure 1) the ERP-analyses revealed that up-state cues were located at the down-to-up transition of the cortical slow wave (beginning of slow oscillatory up-state), and that down-state cues were played at the up-to-down transition (beginning of slow wave down-state), confirming that the slow wave detection algorithm does indeed detect the proposedly critical states of the slow wave. Data is shown for electrode Fz.
